# Supplementary material for: Neuron loss and degeneration in the progression of TDP-43 in frontotemporal lobar degeneration
Source: PubMed Central journal article supplement (PMC5586052; doi:10.1186/s40478-017-0471-3), 2017-09-06
Supplement: 40478_2017_471_MOESM1_ESM.pdf [file 40478_2017_471_MOESM1_ESM.pdf]

Electronic Supplementary Material

**Neuron loss and degeneration in the progression of TDP-43 proteinopathy**

Acta Neuropathologica

<sup>1</sup>Ahmed Yousef, <sup>1</sup>John L. Robinson, <sup>1,2</sup>David J. Irwin, <sup>1</sup>Matthew D. Byrne, <sup>1</sup>Linda K. Kwong, <sup>1</sup>Edward B. Lee, <sup>1</sup>Yan Xu, <sup>3</sup>Sharon X. Xie, <sup>3</sup>Lior Rennert, <sup>1</sup>EunRan Suh, <sup>1</sup>Vivianna M. Van Deerlin, <sup>1,2</sup>Murray Grossman, <sup>1</sup>Virginia M.-Y. Lee, <sup>1</sup>John Q. Trojanowski

From

<sup>1</sup>Center for Neurodegenerative Disease Research and Institute on Aging, <sup>2</sup>Department of Neurology, <sup>3</sup>Department of Biostatistics and Epidemiology, University of Pennsylvania Perelman School of Medicine, Philadelphia, PA 19104, USA

\*Correspondence to: trojanow@upenn.edu, 215-662-4474

Fig. S1

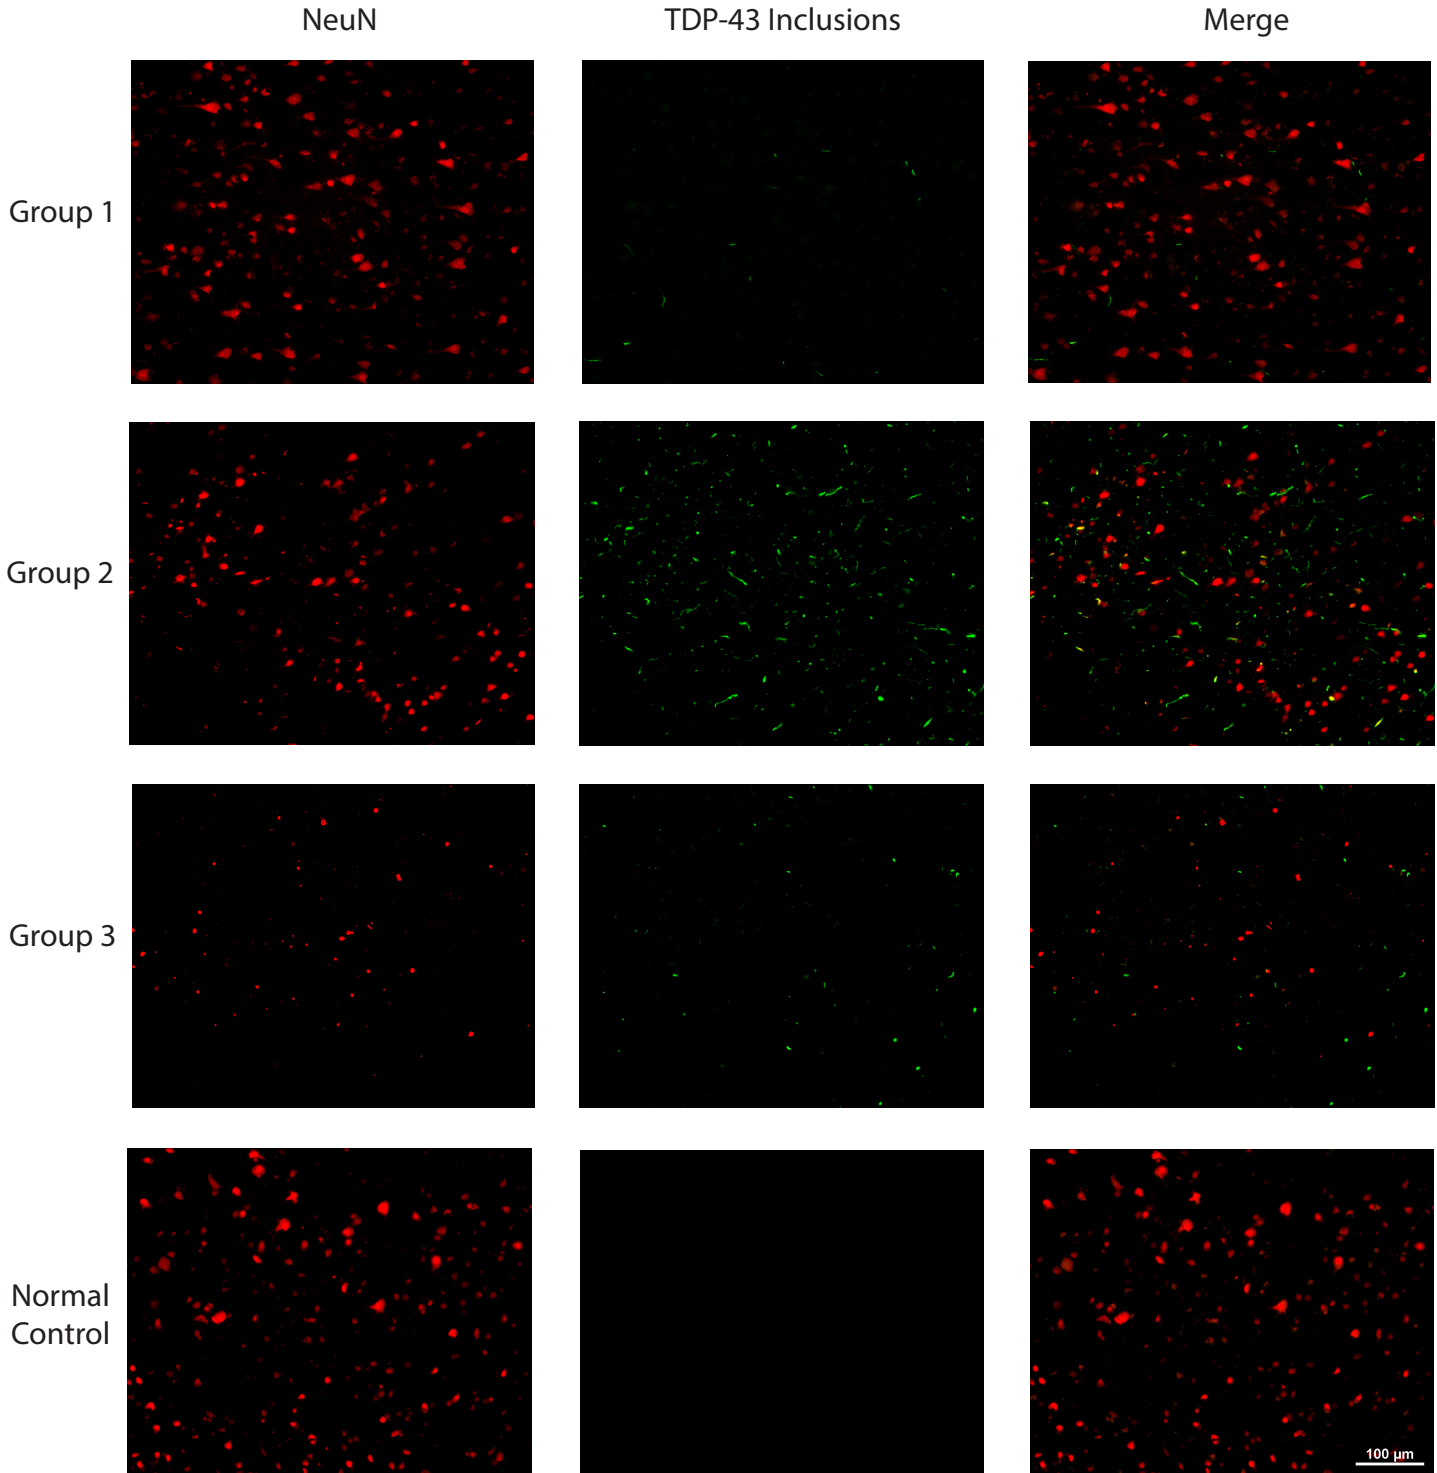

Fig. S2

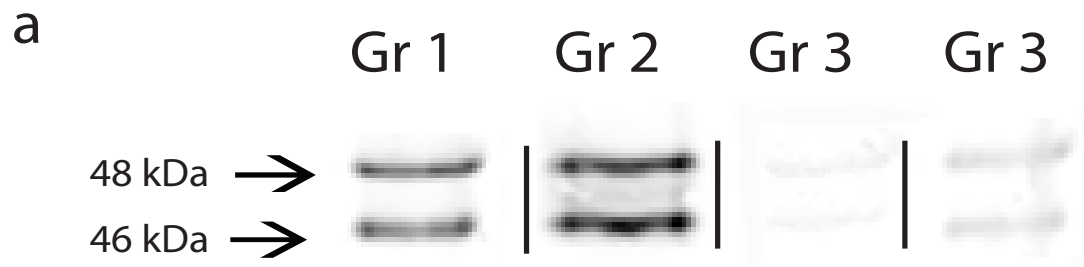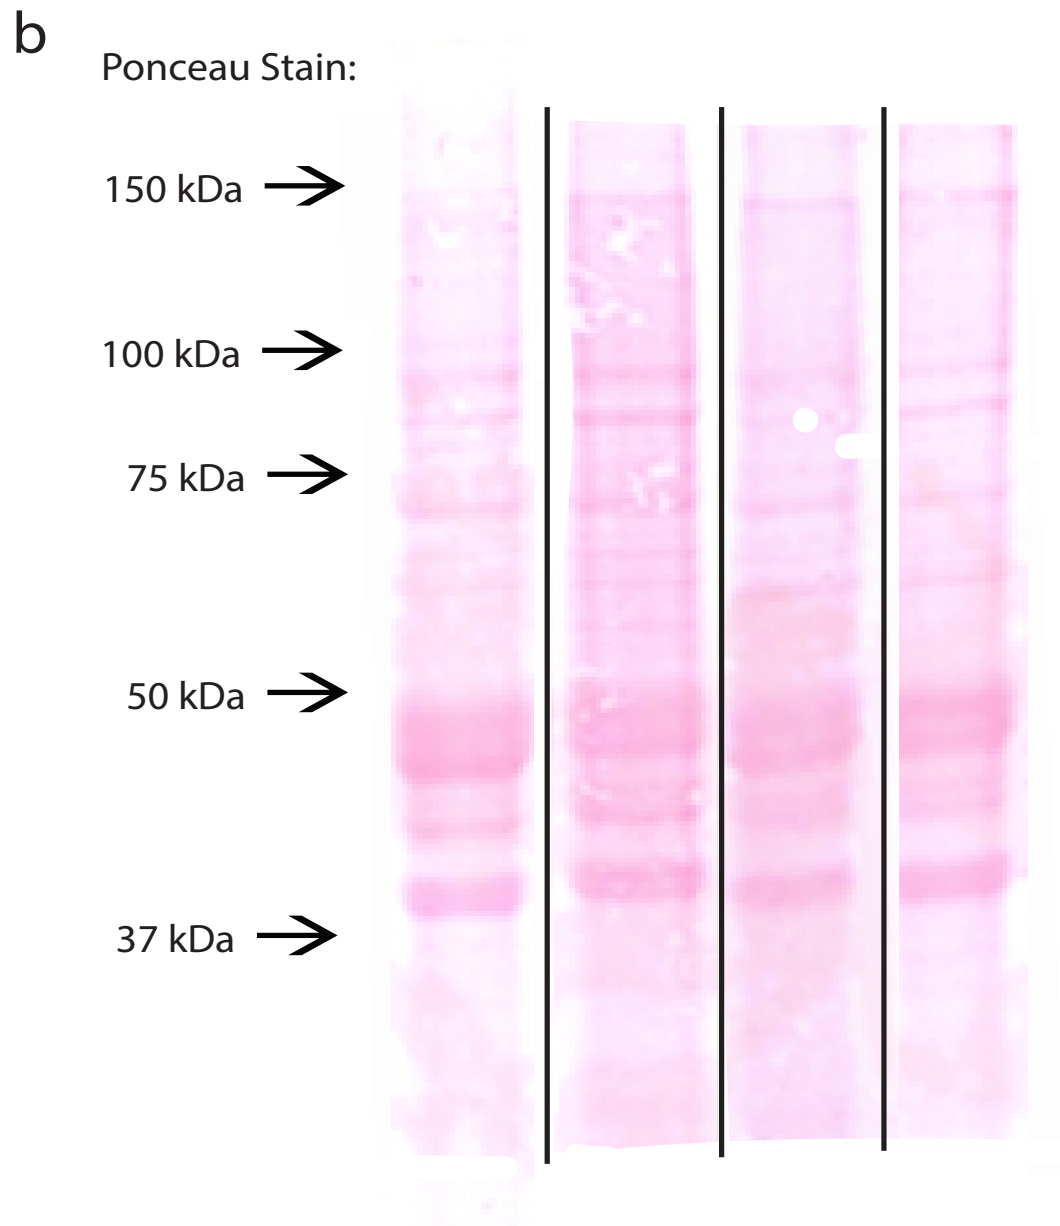

Fig. S3

Group 1

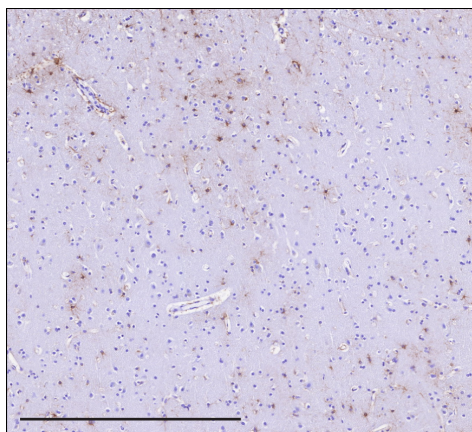

Group 2

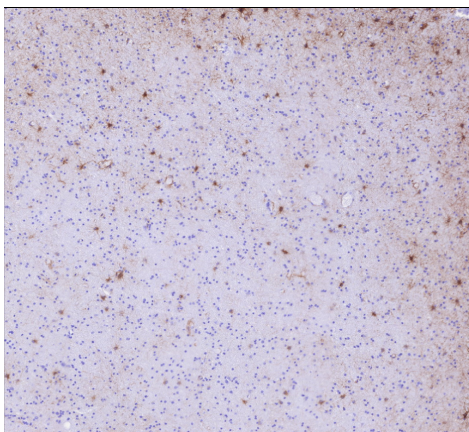

Group 3

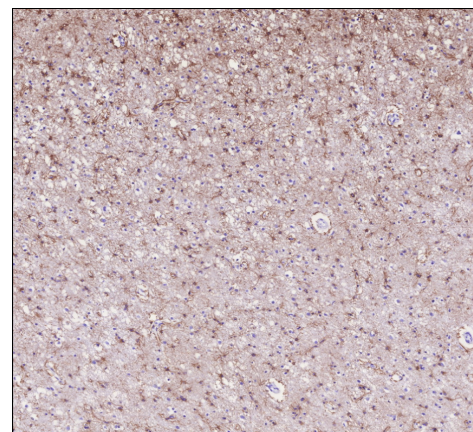

GFAP



Fig. S4

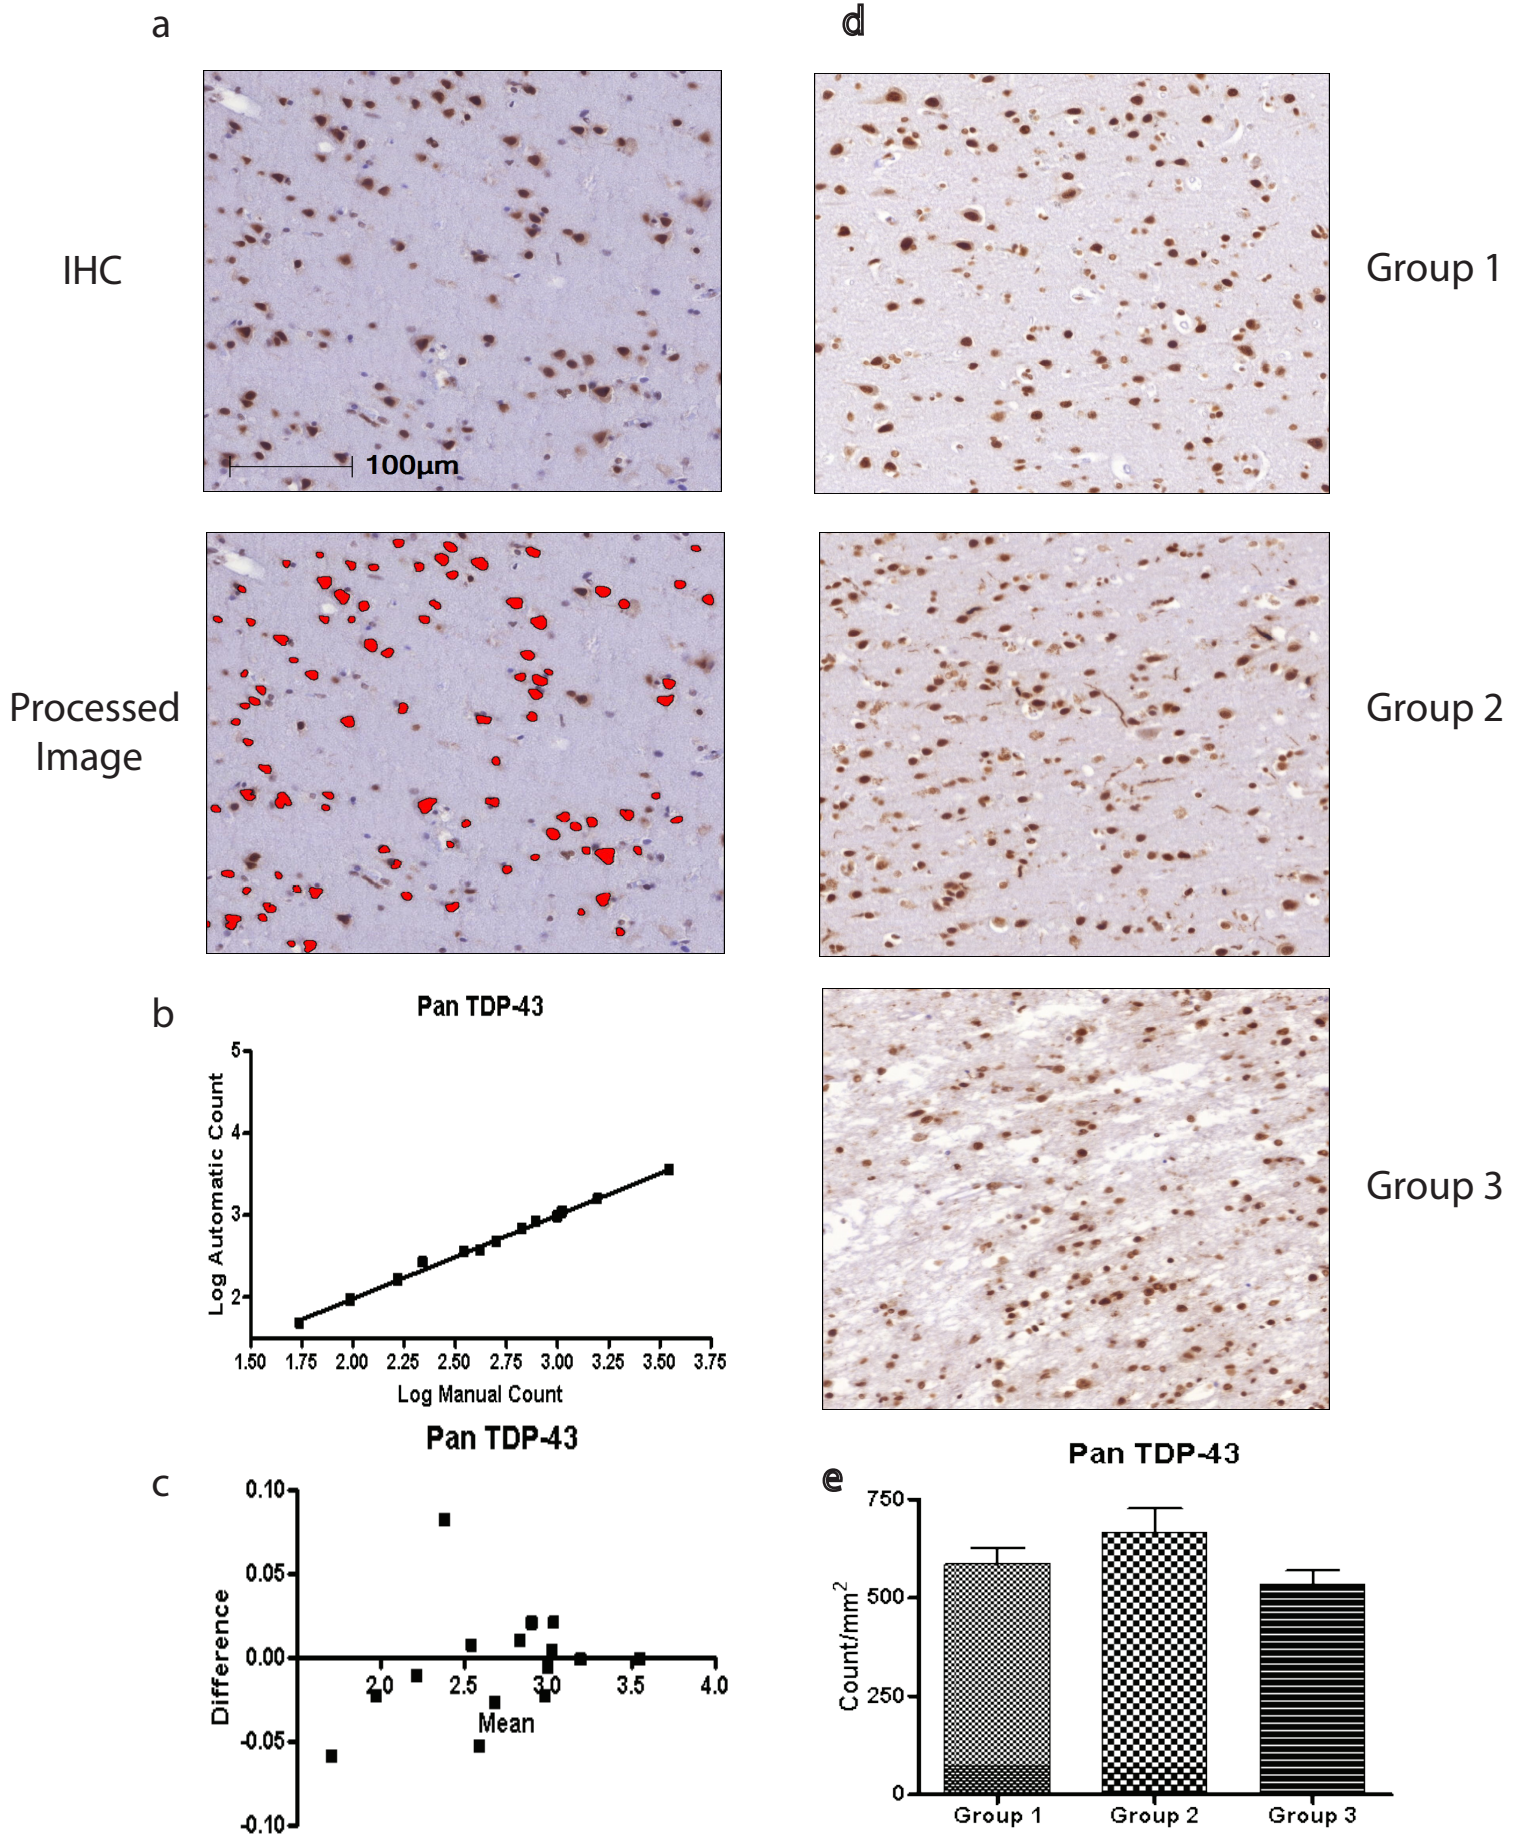

**Table S1** Focused analyses of bvFTLD-TDP recapitulate spread of pathology and genetic differences.

| Measure                     | Estimate | Standard Error | Chi-Squared with DF=1 (P-Value) | OR (95% CI)           | Chi-squared (DF) (P-Value) |
|-----------------------------|----------|----------------|---------------------------------|-----------------------|----------------------------|
| <b>Phase</b>                |          |                |                                 |                       |                            |
| I <sup>1</sup>              | -2.057   | 0.658          | 9.78<br>(0.0018)                | 0.13<br>(0.04-0.46)   |                            |
| II <sup>2</sup>             | -0.422   | 0.421          | 1.01<br>(0.3160)                | 0.66<br>(0.29-1.50)   | 6.70<br>(2)                |
| III/IV <sup>3</sup>         | 2.478    | 0.527          | 22.09<br>(<0.0001)              | 11.92<br>(4.24-33.52) | (0.0352)                   |
| <b>Mutation</b>             |          |                |                                 |                       |                            |
| Non-C9/GRN <sup>4</sup>     | 0.492    | 0.860          | 0.33<br>(0.5675)                | 1.64<br>(0.30-8.82)   |                            |
| <i>C9orf72</i> <sup>5</sup> | -1.721   | 0.664          | 6.72<br>(0.0095)                | 0.18<br>(0.05-0.66)   | 5.45<br>(2)                |
| <i>GRN</i> <sup>6</sup>     | 1.230    | 0.996          | 1.52<br>(0.2169)                | 3.42<br>(0.49-24.07)  | (0.0656)                   |

<sup>1</sup>Phase III/IV is reference group.

<sup>2</sup>I is reference group.

<sup>3</sup>II is reference group.

<sup>4</sup>*GRN* is reference group.

<sup>5</sup>Non-C9/GRN is reference group.

<sup>6</sup>*C9orf72* is the reference group.

\*GEE using a proportional odds model for Group 1-2 based on 80 observations. I- orbital frontal cortex; II- mid-frontal, anterior cingulate, entorhinal and superior temporal cortices; III- motor, sensory, and angular cortices; IV- visual cortex. Regions III and IV are combined due to small number of observations in each region.

**Table S2** Focused analyses of non-bvFTLD-TDP recapitulate spread of pathology and genetic differences.

| Measure                     | Estimate | Standard Error | Chi-Squared with DF=1 (P-Value) | OR (95% CI)         | Chi-squared (DF) (P-Value) |
|-----------------------------|----------|----------------|---------------------------------|---------------------|----------------------------|
| <b>Phase</b>                |          |                |                                 |                     |                            |
| I <sup>1</sup>              | -0.863   | 0.347          | 6.18<br>(0.0129)                | 0.42<br>(0.21-0.83) |                            |
| II <sup>2</sup>             | -0.139   | 0.448          | 0.10<br>(0.7566)                | 0.87<br>(0.36-2.10) | 10.22<br>(2)               |
| III/IV <sup>3</sup>         | 1.002    | 0.282          | 12.67<br>(0.0004)               | 2.72<br>(1.57-4.73) | (0.0060)                   |
| <b>Mutation</b>             |          |                |                                 |                     |                            |
| Non-C9/GRN <sup>4</sup>     | 1.143    | 0.551          | 4.30<br>(0.0380)                | 3.14<br>(1.07-9.23) |                            |
| <i>C9orf72</i> <sup>5</sup> | -0.796   | 0.488          | 2.66<br>(0.1028)                | 0.45<br>(0.17-1.17) | 4.62<br>(2)                |
| <i>GRN</i> <sup>6</sup>     | -0.347   | 0.543          | 0.41<br>(0.5235)                | 0.71<br>(0.24-2.05) | (0.0991)                   |

<sup>1</sup>Phase III/IV is reference group.

<sup>2</sup>I is reference group.

<sup>3</sup>II is reference group.

<sup>4</sup>*GRN* is reference group.

<sup>5</sup>Non-C9/GRN is reference group.

<sup>6</sup>*C9orf72* is the reference group.

\*GEE using a proportional odds model for Group 1-2 based on 193 observations. I- orbital frontal cortex; II- mid-frontal, anterior cingulate, entorhinal and superior temporal cortices; III- motor, sensory, and angular cortices; IV- visual cortex. Regions III and IV are combined due to small number of observations in each region.

**Table S3** Superior temporal cortex tissue recapitulates genetic differences in FTLT-DTP.

|                 |                                    | Group                         |                               |                               |             |
|-----------------|------------------------------------|-------------------------------|-------------------------------|-------------------------------|-------------|
|                 |                                    | 1                             | 2                             | 3                             | Total       |
| Mutation Status | Count<br>Total %<br>Col %<br>Row % |                               |                               |                               |             |
|                 | Non-C9/GRN                         | 11<br>19.3%<br>64.7%<br>39.3% | 12<br>21.1%<br>66.7%<br>42.9% | 5<br>8.8%<br>22.7%<br>17.9%   | 28<br>49.1% |
|                 | <i>C9orf72</i>                     | 2<br>3.5%<br>11.8%<br>11.8%   | 4<br>7.0%<br>22.2%<br>23.5%   | 11<br>19.3%<br>50.0%<br>64.7% | 17<br>29.8% |
|                 | <i>GRN</i>                         | 4<br>7.0%<br>23.5%<br>33.3%   | 2<br>3.5%<br>11.1%<br>16.7%   | 6<br>10.5%<br>27.3%<br>50.0%  | 12<br>21.1% |
|                 | Total                              | 17<br>29.8%                   | 18<br>31.6%                   | 22<br>38.6%                   | 57          |

\*A 2-sided Fisher's exact test finds a significantly different distribution of Groups in the three mutation statuses (p=0.018).
